# Supplementary material for: Multiscale Porous Carbon Materials by In Situ Growth of Metal–Organic Framework in the Micro-Channel of Delignified Wood for High-Performance Water Purification
Source: MDPI journal article supplement (doi:10.3390/nano13192695), 2023-10-03
Supplement: s1 [file s1]

# Supporting Information

## **Multiscale Porous Carbon Materials by In-situ Growth of Metal-Organic Framework in the Micro-channel of Delignified Wood for High-Performance Water Purification**

Youngho Jeon<sup>1</sup>, Dabum Kim<sup>1</sup>, Suji Lee<sup>1</sup>, Kangyun Lee<sup>1</sup>, Youngsang Ko<sup>1</sup>, Goomin Kwon<sup>1</sup>, Jisoo Park<sup>2</sup>, Ung-Jin Kim<sup>1</sup>, Sung Yeon Hwang<sup>1</sup>, Jeonghun Kim<sup>2,\*</sup>, Jungmok You<sup>1,\*</sup>

<sup>1</sup> *Department of Plant & Environmental New Resources and Institute of Graduate School of Green-Bio Science, Kyung Hee University, 1732 Deogyeong-daero, Giheung-gu, Yongin-si, Gyeonggi-do, 17104, Republic of Korea*

<sup>2</sup> *Department of Chemical and Biomolecular Engineering, Yonsei University, 50 Yonsei-ro, Seodaemun-gu, Seoul, 0372, Republic of Korea*

### **\*Corresponding Author:**

J. Kim, E-mail: jhkim03@yonsei.ac.kr

J. You, E-mail: jmyou@khu.ac.kr

**Table S1.** Adsorption isotherm model parameters for RhB on balsa wood, TW-CA, ZIF-8/DW-CA, and ZIF-8/TW-CA.

| Samples     | Experimental<br>$q_{\max}$ (mg/g) | Langmuir             |        |       | Freundlich |        |       |
|-------------|-----------------------------------|----------------------|--------|-------|------------|--------|-------|
|             |                                   | $q_{\max}$<br>(mg/g) | $K_L$  | $R^2$ | $n$        | $K_F$  | $R^2$ |
| Balsa wood  | 43.15                             | 51.06                | 0.0071 | 0.95  | 2.5        | 3.05   | 0.91  |
| ZIF-8/DW-CA | 119.4                             | 129.64               | 0.0076 | 0.94  | 2.69       | 9.637  | 0.98  |
| ZIF-8/TW-CA | 169.4                             | 173.4                | 0.0102 | 0.92  | 2.85       | 15.876 | 0.99  |

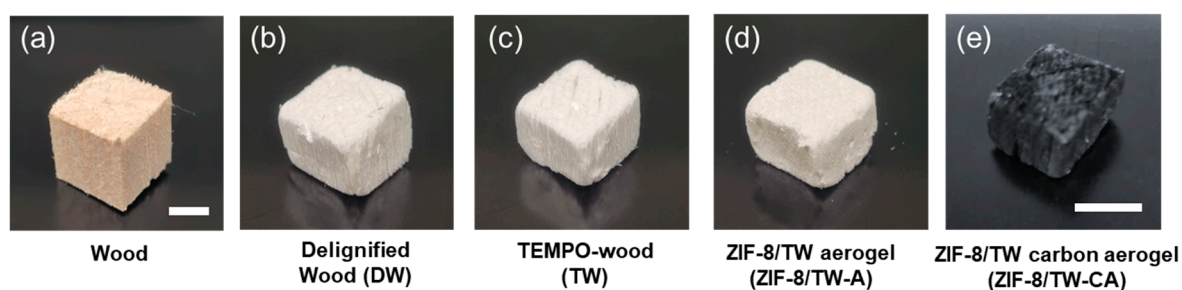

**Figure S1.** Photographs of (a) pristine wood, (b) delignified wood (DW), (c) TW, (d) ZIF-8/TW-A, and (e) ZIF-8/TW-CA. Scale bar = 0.5 mm

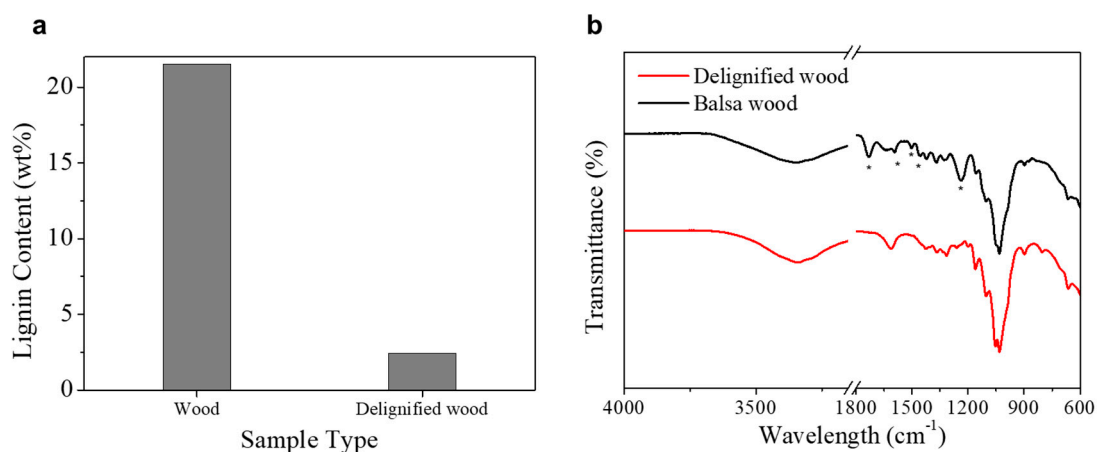

**Figure S2.** (a) Lignin contents of balsa wood, delignified wood and TEMPO wood after Klason lignin analysis. (b) FT-IR spectra of balsa wood and delignified wood.

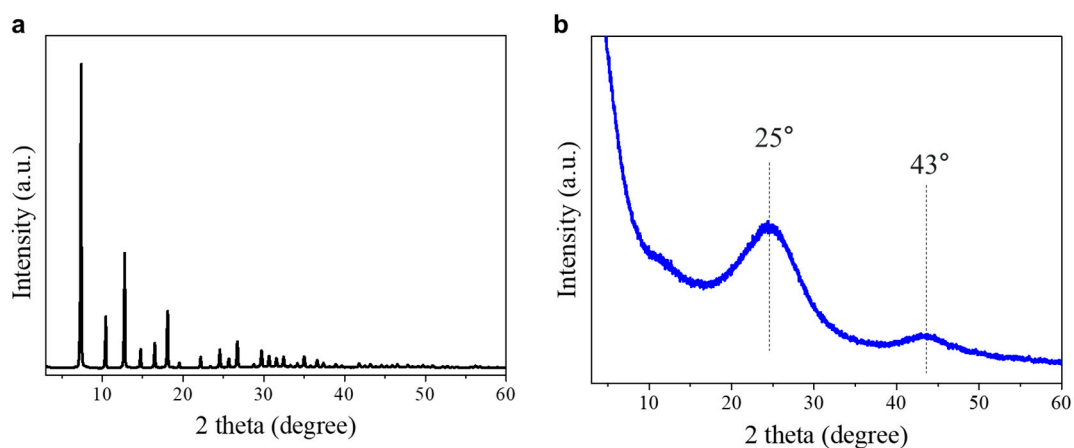

**Figure S3.** XRD pattern obtained from (a) synthesized ZIF-8 and (b) ZIF-8/TW-CA.

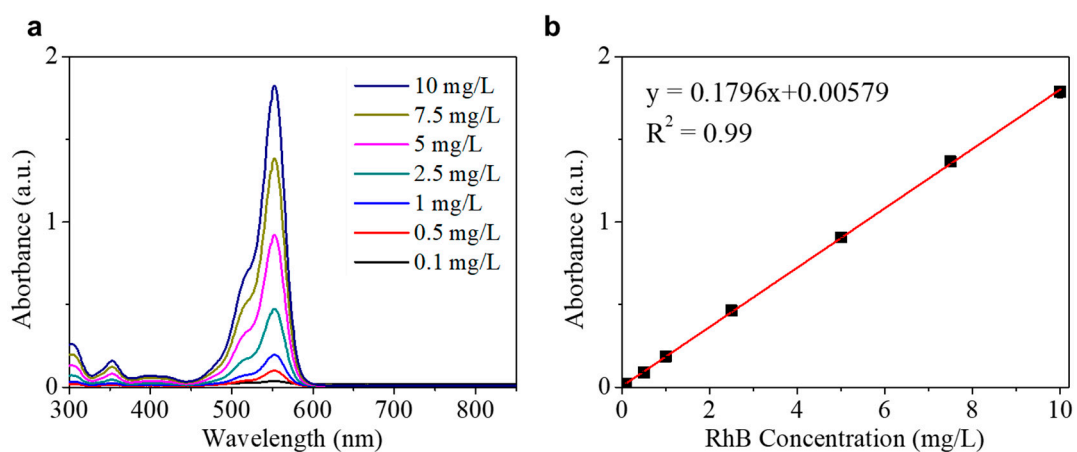

**Figure S4.** (a) Adsorption spectra of RhB dye at diverse concentrations (0.1–10 mg/L). (b) Calibration curve for the adsorption of RhB dye.

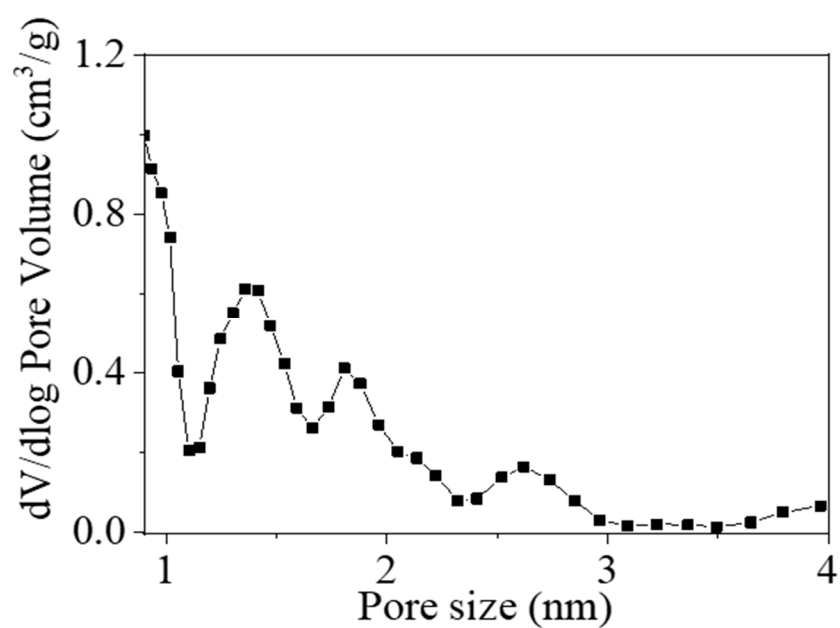

**Figure S5.** The corresponding pore-size distributions of ZIF-8/DW-CA.

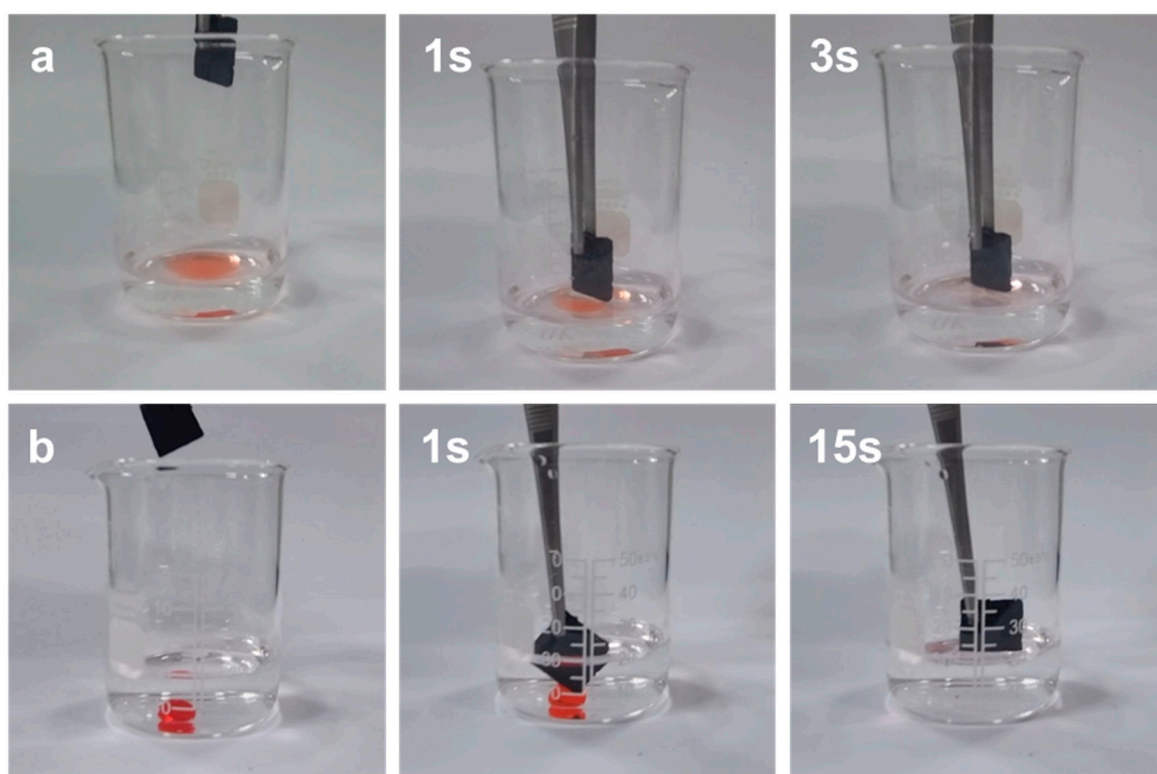

**Figure S6.** Photograph of the removal of (a) *n*-hexane (stained with Sudan III) and (b) chloroform (stained with Sudan III) by using ZIF-8/TW-CA.
